# Supplementary material for: Prussian Blue Analogue-Derived Fe-Doped CoS2 Nanoparticles Confined in Bayberry-like N-Doped Carbon Spheres as Anodes for Sodium-Ion Batteries
Source: MDPI journal article supplement (doi:10.3390/polym15061496), 2023-03-17
Supplement: s1 [file s1]

**Supplementary Material for**  
**Prussian Blue Analogue-Derived Fe-Doped CoS<sub>2</sub> Nanoparticles**  
**Confined in Bayberry-Like N-Doped Carbon Spheres as Anodes for**  
**Sodium-Ion Batteries**

Jiajia Hu, Cheng Liu, Chen Cai, Qianqian Sun, Mixue Lu, Zhujun Yao, and Yefeng Yang\*

*School of Materials Science and Engineering, Zhejiang Sci-Tech University, Hangzhou 310018, China*

\* Correspondence: yangyf@zstu.edu.cn; Tel.: +86-571 8684 5569

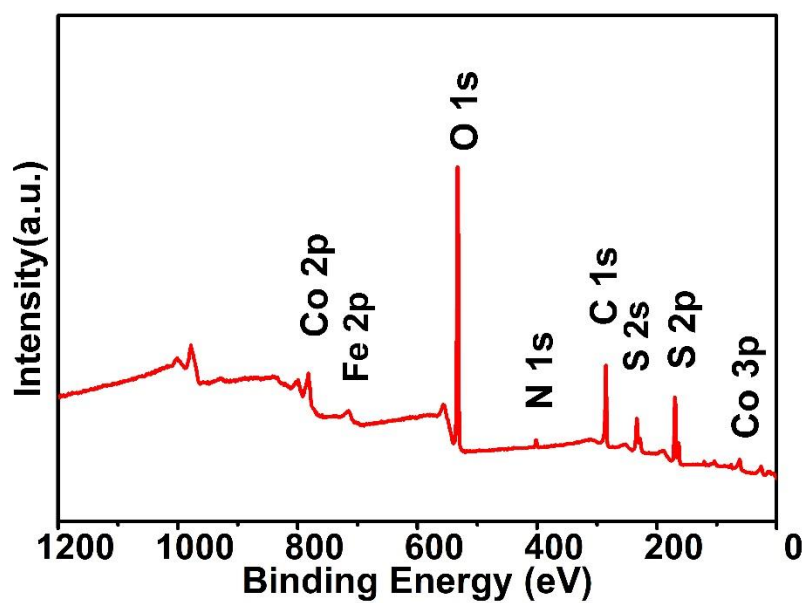

**Figure S1.** XPS survey spectrum of the Fe-CoS<sub>2</sub>/NC-3.

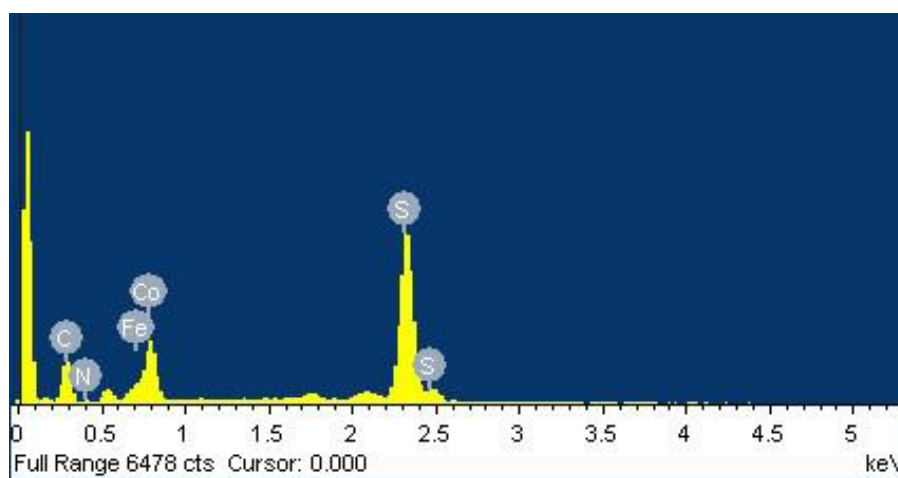

**Figure S2.** EDS spectrum of the Fe-CoS<sub>2</sub>/NC-3 sample.

**Table S1.** The element contents in Fe-CoS<sub>2</sub>/NC-3 measured by EDS measurement.

| Element        | Co   | Fe  | S    | C    | N   | Total |
|----------------|------|-----|------|------|-----|-------|
| Contents (wt%) | 30.0 | 3.7 | 33.0 | 31.3 | 2.1 | 100.0 |

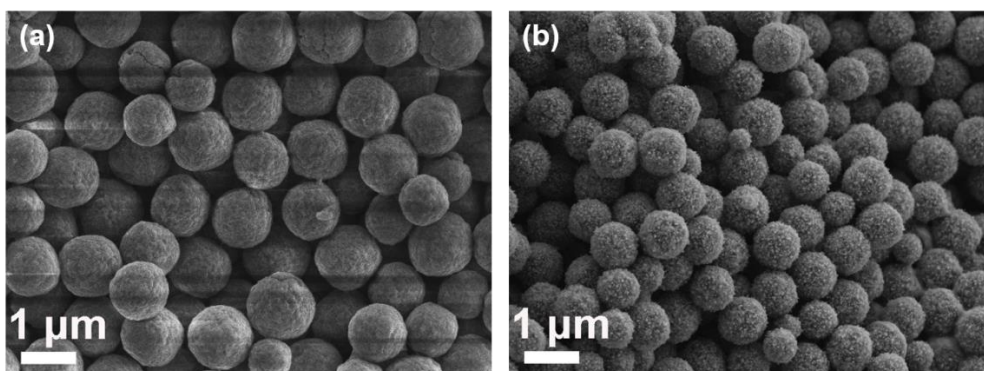

**Figure S3.** SEM images of (a) ZnCo-PBA precursor spheres, and (b) CoS<sub>2</sub>/NC spheres.

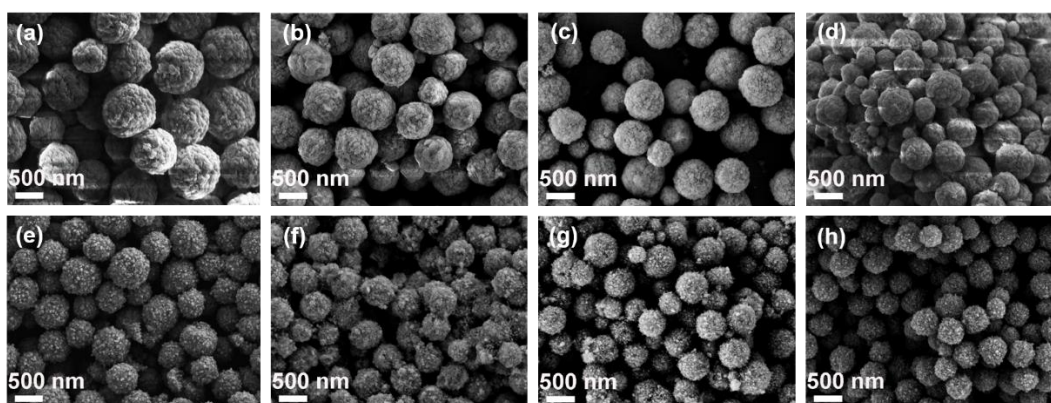

**Figure S4.** SEM images of (a) FeZnCo-PBA-1, (b) FeZnCo-PBA-2, (c) FeZnCo-PBA-3, (d) FeZnCo-PBA-4 precursor spheres, (e) Fe-CoS<sub>2</sub>/NC-1, (f) Fe-CoS<sub>2</sub>/NC-2, (g) Fe-CoS<sub>2</sub>/NC-3, and (h) Fe-CoS<sub>2</sub>/NC-4 hybrid spheres.

**Table S2.** The average diameters of precursors and obtained samples derived from the reactions with different introduced amounts of  $\text{FeCl}_3$ .

| Precursors   | Average diameter | Samples                         | Average diameter |
|--------------|------------------|---------------------------------|------------------|
| ZnCo-PBA     | 1000 nm          | $\text{CoS}_2/\text{NC}$        | 810 nm           |
| FeZnCo-PBA-1 | 723 nm           | Fe- $\text{CoS}_2/\text{NC}$ -1 | 482 nm           |
| FeZnCo-PBA-2 | 583 nm           | Fe- $\text{CoS}_2/\text{NC}$ -2 | 478 nm           |
| FeZnCo-PBA-3 | 572 nm           | Fe- $\text{CoS}_2/\text{NC}$ -3 | 450 nm           |
| FeZnCo-PBA-4 | 496 nm           | Fe- $\text{CoS}_2/\text{NC}$ -4 | 408 nm           |

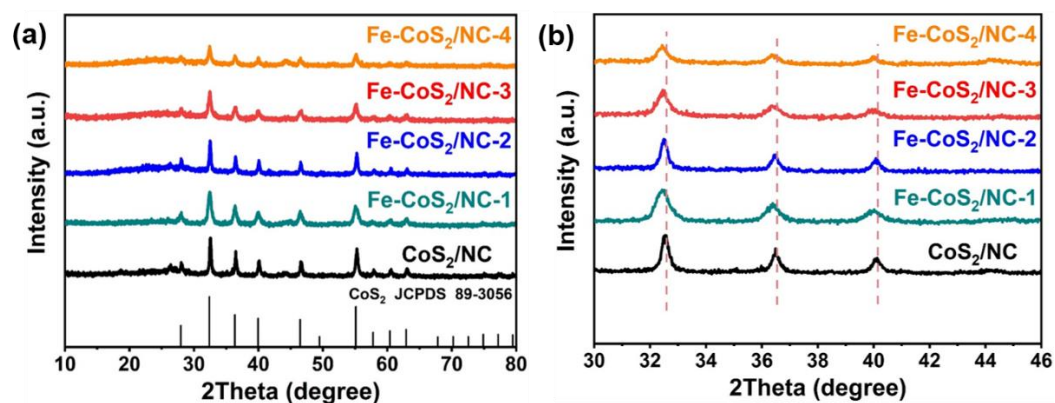

**Figure S5.** (a) XRD patterns of  $\text{CoS}_2/\text{NC}$ , Fe- $\text{CoS}_2/\text{NC}$ -1, Fe- $\text{CoS}_2/\text{NC}$ -2, Fe- $\text{CoS}_2/\text{NC}$ -3, and Fe- $\text{CoS}_2/\text{NC}$ -4 spheres in the range of  $10$ – $80^\circ$ , and (b) zoom view of (a) in the range of  $30$ – $46^\circ$ .

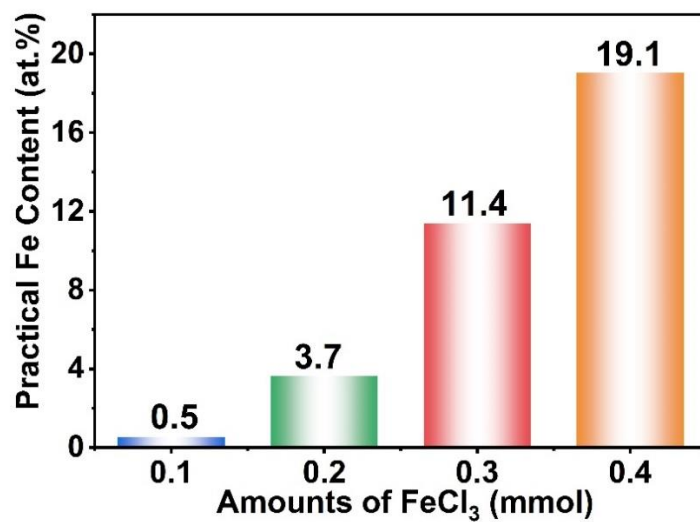

**Figure S6.** The practical Fe contents in products and the feeding Fe contents in the starting materials of Fe-CoS<sub>2</sub>/NC-1, Fe-CoS<sub>2</sub>/NC-2, Fe-CoS<sub>2</sub>/NC-3, and Fe-CoS<sub>2</sub>/NC-4.

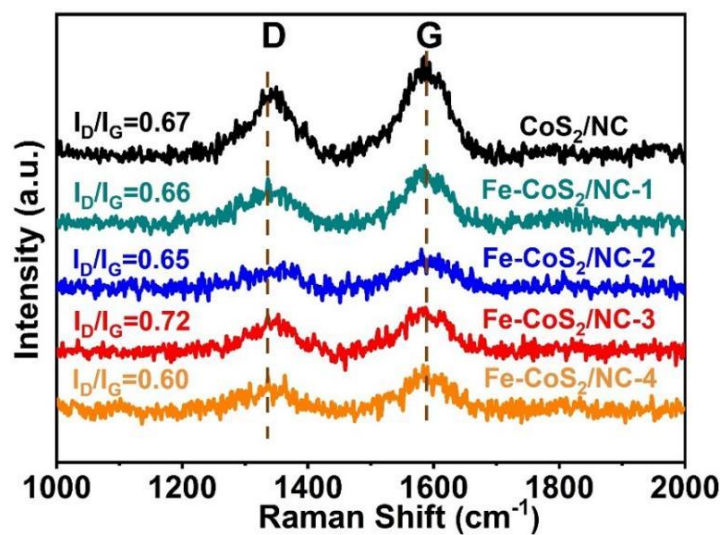

**Figure S7.** Raman spectra of CoS<sub>2</sub>/NC, Fe-CoS<sub>2</sub>/NC-1, Fe-CoS<sub>2</sub>/NC-2, Fe-CoS<sub>2</sub>/NC-3, and Fe-CoS<sub>2</sub>/NC-4.

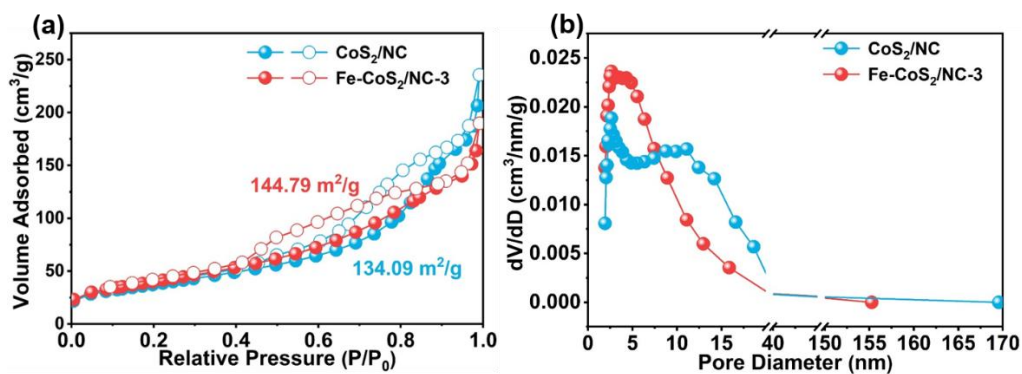

**Figure S8.** (a)  $N_2$  adsorption-desorption isotherms curves of  $CoS_2/NC$  and  $Fe-CoS_2/NC-3$ , and (b) pore size distributions of the  $CoS_2/NC$  and  $Fe-CoS_2/NC-3$ .

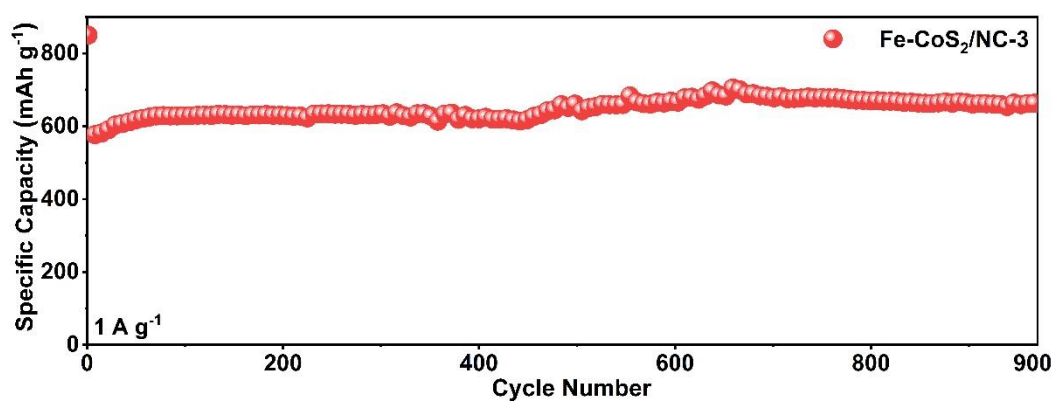

**Figure S9.** Long-term cycling performance of the  $Fe-CoS_2/NC-3$  electrode.

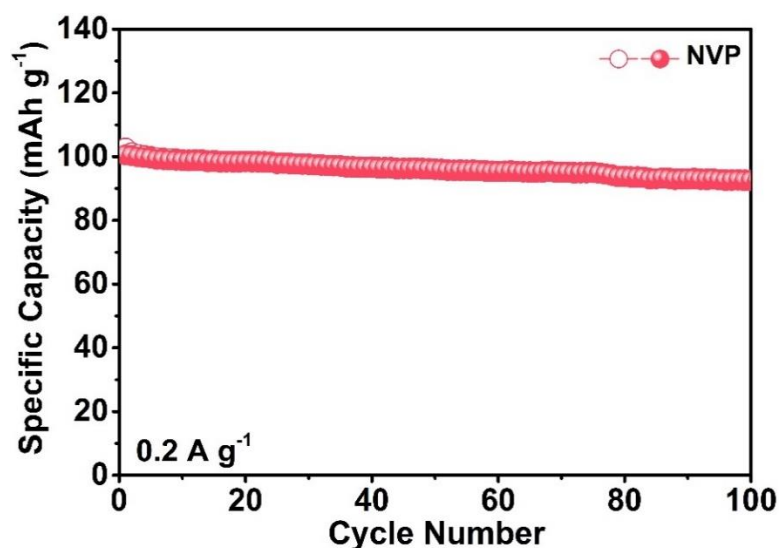

**Figure S10.** Cycling performance of NVP at current density of  $0.2 \text{ A g}^{-1}$ .

**Table S3.** Comparison of electrochemical performance of Fe-CoS<sub>2</sub>/NC-3//NVP full SIBs in this work with previously reported metal sulfide-NVP full SIBs.

| Anode                                                           | Cathode | Capacity/current density/cycles<br>(mAh g <sup>-1</sup> /A g <sup>-1</sup> /n) | Energy density/current density (Wh kg <sup>-1</sup> /A g <sup>-1</sup> ) | Power density (W kg <sup>-1</sup> ) | Ref.      |
|-----------------------------------------------------------------|---------|--------------------------------------------------------------------------------|--------------------------------------------------------------------------|-------------------------------------|-----------|
| Fe-CoS <sub>2</sub> /NC-3                                       | NVP     | 313/0.5/60                                                                     | 102/0.2                                                                  | 74                                  | This work |
| SnS/Fe <sub>2</sub> O <sub>3</sub> -G                           | NVP     | 51/1/200                                                                       | 141.8/0.2                                                                | 60                                  | [75]      |
| FeS@NCG                                                         | NVP@C   | 308/0.6/150                                                                    | 218/0.6                                                                  | —                                   | [76]      |
| FeS <sub>2</sub> @G@CNF                                         | NVP@C   | 102/1C/100                                                                     | 169/1C                                                                   | 88                                  | [77]      |
| V <sub>3</sub> S <sub>4</sub> @CNF                              | NVP/C   | 365/0.1/20                                                                     | 400/0.1                                                                  | —                                   | [78]      |
| Ti <sub>3</sub> C <sub>2</sub> T <sub>x</sub> /FeS <sub>2</sub> | NVP     | 365/3/200                                                                      | 80/5                                                                     | —                                   | [79]      |
| Cu-SnS <sub>2</sub> @NC                                         | NVP     | 223/0.5/50                                                                     | 233                                                                      | 240                                 | [80]      |
| NiS <sub>2</sub> @SnS <sub>2</sub>                              | NVP     | 628/0.5/150                                                                    | 274                                                                      | 52.1                                | [73]      |
